# Supplementary material for: Silencing of the ARK5 gene reverses the drug resistance of multidrug-resistant SGC7901/DDP gastric cancer cells
Source: PeerJ journal article supplement (doi:10.7717/peerj.9560), 2020-08-07
Supplement: Raw_data_of_Figure7.zip [file Raw_data_of_Figure7.zip]

## Sheet: Sheet1
	Tumour volume (mm3)
X axis	Group A					Group B
Time(days)	SGC7901					SGC7901/DDP
1	0	0	0	0	0	0	0	0	0	0
10	55.5	45.1	53.4	50.6	49.7	49.5	52.9	50.7	53	51.6
13	60.1	46.2	59.2	51.5	52.4	61.2	65.5	67.2	63.9	62.2
16	67.8	47.5	65.2	56.9	57.3	80.7	89.2	88	70.5	69.7
19	99.7	48.9	69.5	58.1	62.8	106.5	154.3	156.7	116.7	109.5
22	173.4	51.2	105.1	69.2	87.9	197.3	279.3	269.1	207.1	210
25	213.9	54.9	132.7	80.3	102.5	286.2	417.5	403.9	292.2	305.3
28	265.4	57.2	151.3	93.9	115.4	418.1	663.9	649.1	420	437.9
31	315.4	62.1	177.7	104.6	133.7	541	973.4	850	600.1	618.4
